# Supplementary material
Source: PubMed Central journal article supplement (PMC9839644)
Supplement: NIHMS1857141-supplement-1.pdf [file NIHMS1857141-supplement-1.pdf]

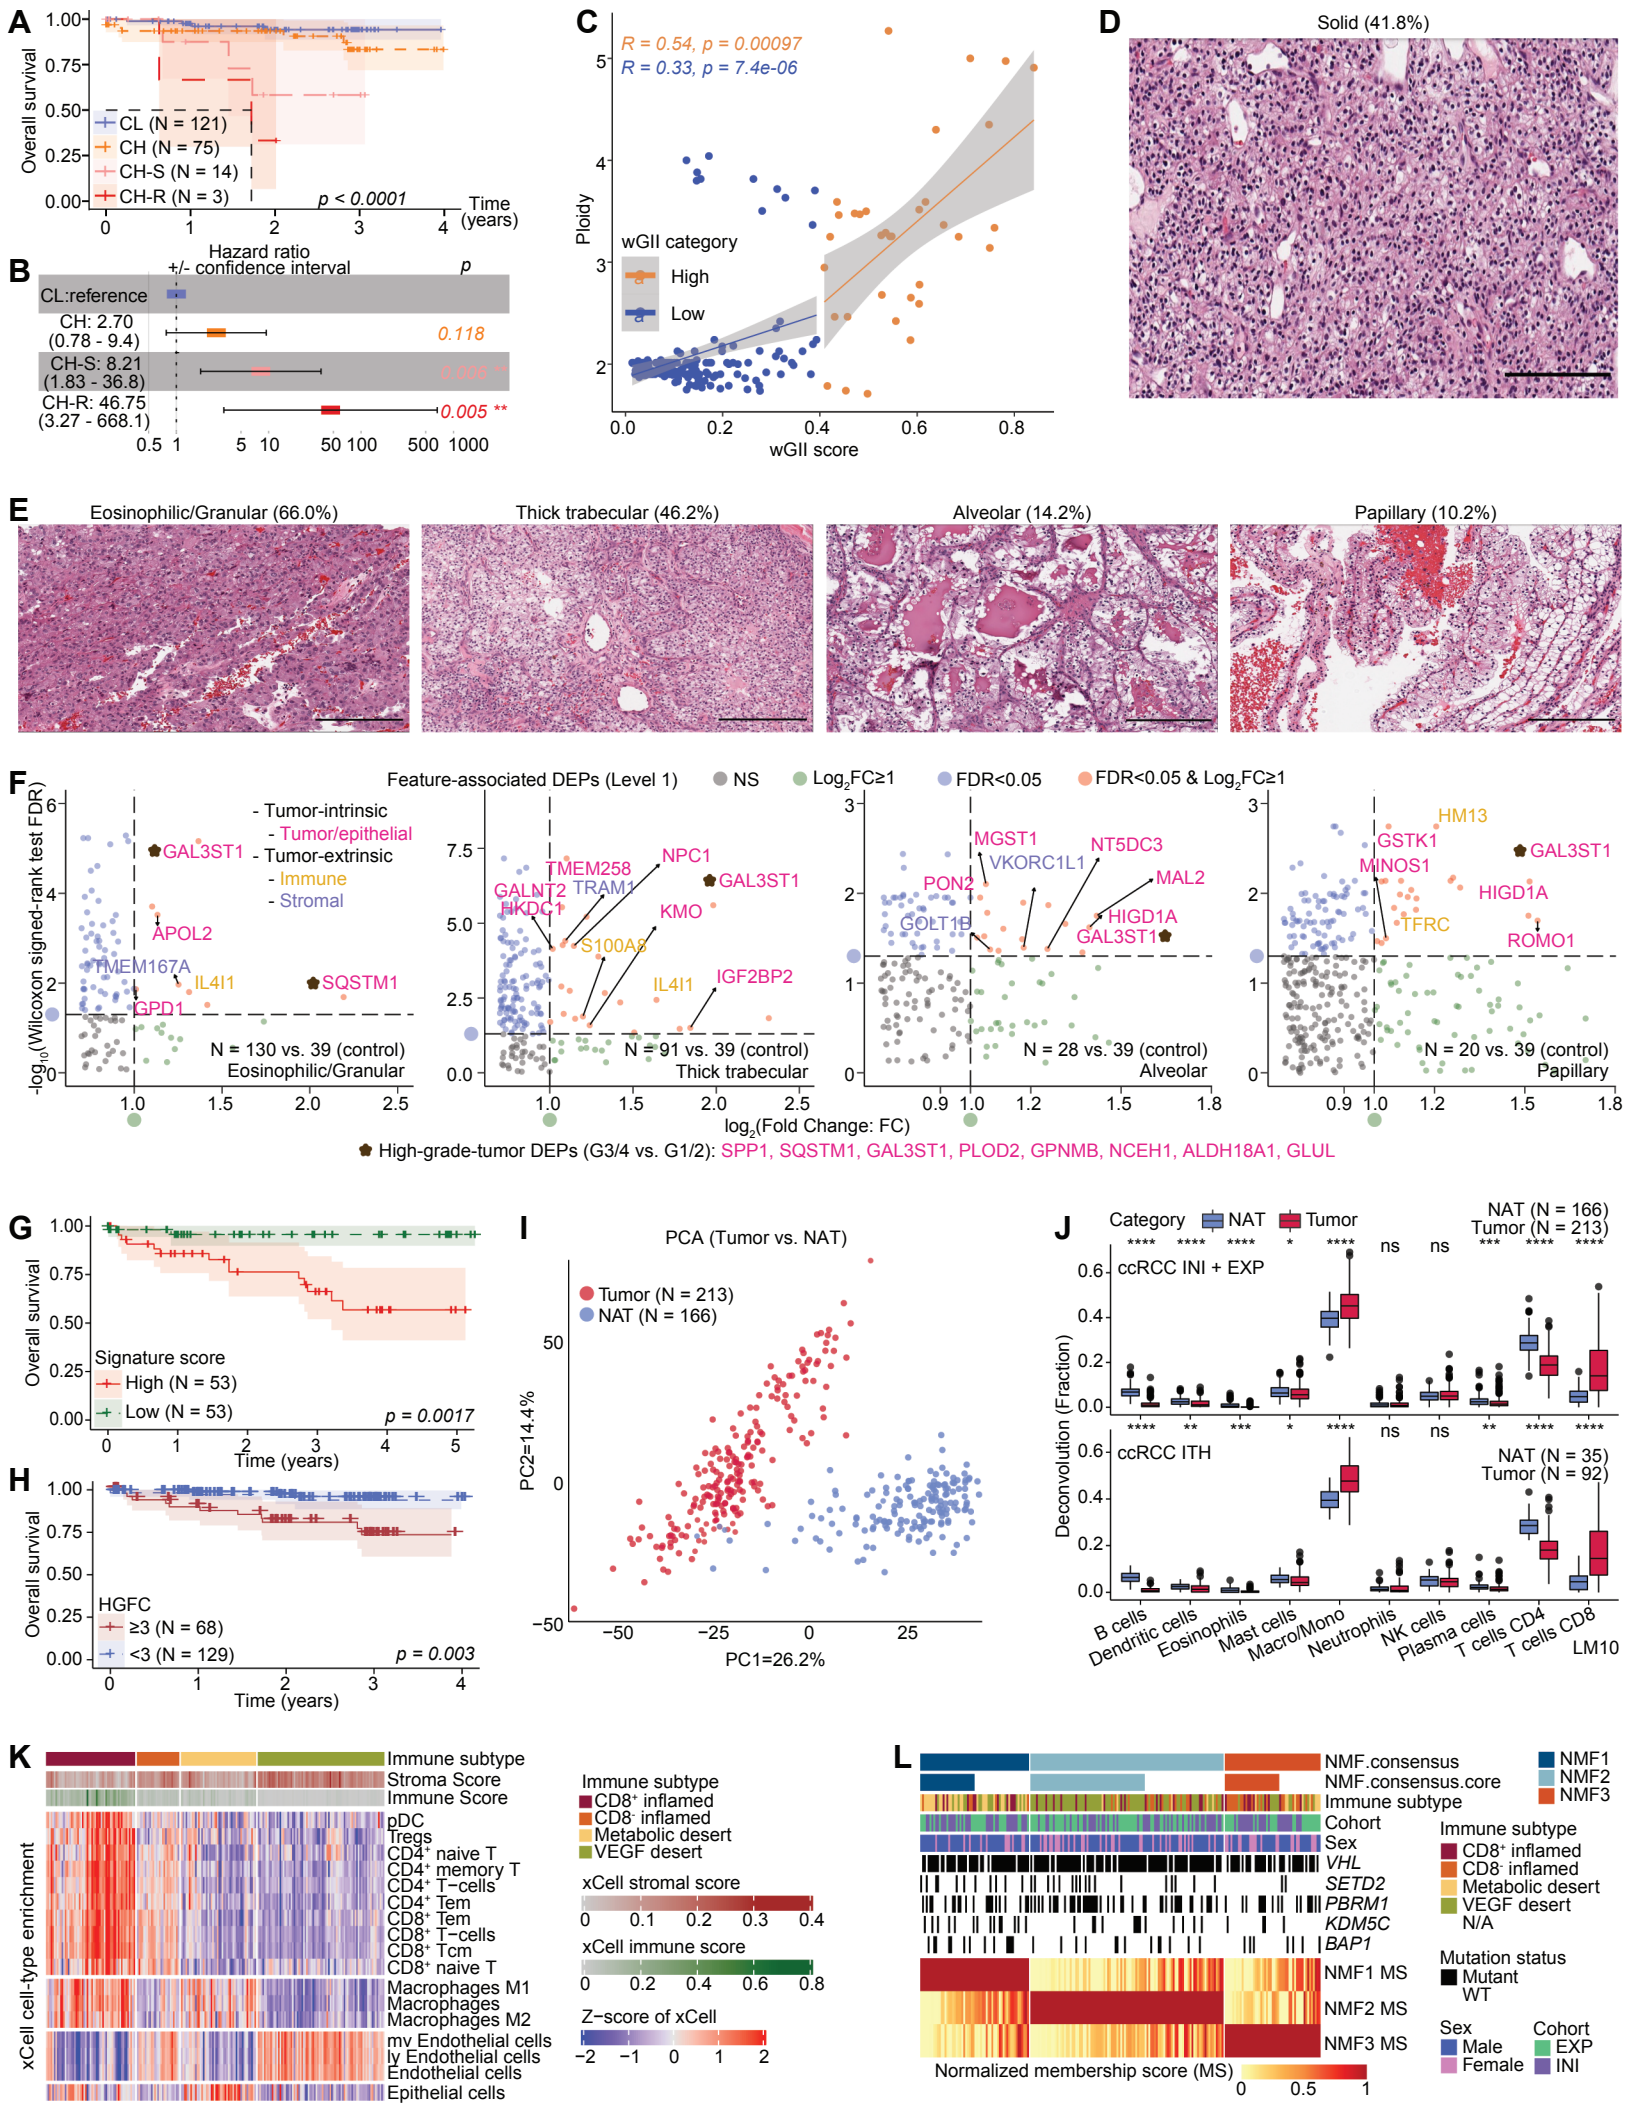

**Figure S1. Association between high-grade feature count (HGFC) and overall survival, immune and multi-omic clusters, related to Figure 1.**

A) Overall survival difference among the four histopathologic subtypes indicated by Kaplan Meier plot indicates the association between overall survival and histopathologic subtypes. Log-rank test  $p < 0.0001$ .

B) The hazard ratios of the histopathologic subtypes CH, CH-S, and CH-R compared to the CL reference. Cox proportional hazards model  $p$  is calculated. Whiskers represent  $+ / -$  95% confidence intervals of the hazard ratios.

C) Scatter plot shows the correlation between the wGII score and ploidy values of all the tumor samples. Tumors were grouped as either containing high or low wGII values. Correlation test  $p$  was calculated.  $R$  represents Pearson correlation coefficient.

D & E) Representative H&E showing the seven high-grade features in schema: solid, eosinophilic/granular change, thick trabeculae, alveolar, and papillary/pseudopapillary pattern, respectively. Scale bar = 200 microns.

F) Proteomic changes associated with tumor architecture (pattern) and cytology subtypes. Volcano plots showed DEPs associated with certain high-grade features. They were identified from DE analysis by comparing such tumors with controls (tumors without any of the seven high-grade features,  $N = 39$ ). Using snRNA-seq, we distinguished the expression profiles of these markers in different cell populations (three major categories: tumor epithelial, immune, and stroma) and labeled the markers by different colors. We performed DE analysis on multiple levels: (bulk proteogenomic expression / snRNA-seq)  $\times$  (cohort / case / segment / tumor-sub-cluster level). Here is Level 1 DE analysis: bulk DEGs/DEPs on the cohort level. DEPs associated with high-grade are listed at the bottom for comparison. FDR indicates false discovery rate.

G) Kaplan Meier plot shows the association between integrative signature score (based on protein abundance of LRRC5, RPN2, and SERPINH1 weighted by length) and overall survival (cases divided into the upper quartile and lower quartile for comparison). Log-rank test  $p$  is 0.0017. The hazard ratio of high group is 4.10 (1.01 - 16.8) from Cox model ( $p = 0.049$ ).

H) Kaplan Meier plot shows the association between HGFC and overall survival (cases divided into those containing less than 3 or 3 and above HGFC features). Log-rank test  $p$  is 0.003. The hazard ratio of  $\geq 3$  group is 3.70 (1.07 - 12.8) from Cox model ( $p = 0.039$ ).

I) Principal component analysis (PCA) of proteomics data obtained from tumors (red dots) and normal adjacent tissues (NATs, blue dots).

J) Box plots representing immune cell type (10 different cell types) abundance as assessed by CIBERSORTx deconvolution tool using Leukocyte signature Matrix 10 (LM10). The comparison of bulk deconvolution with LM10 between tumors (red) and NATs (blue) in INI and EXP cohorts (top panel) and ITH cohort (bottom panel) are shown (Asterix represents significance; ns- not significant). Wilcoxon signed-rank test  $p$  is calculated. ns  $p > 0.05$ , \*  $p \leq 0.05$ , \*\*  $p \leq 0.01$ , \*\*\*  $p \leq 0.001$ , \*\*\*\*  $p \leq 0.0001$ . Boxes represent the interquartile range (IQR, e.g., median indicated by solid line in box, 0.25 and 0.75 quantiles) and whiskers represent the largest and smallest values within 1.5  $\times$  IQR range.

K) Heatmap represents the xCell cell-type-enrichment-based immune subtyping performed for the entire cohort. The four immune subtypes identified include CD8<sup>+</sup> inflamed; CD8<sup>-</sup> inflamed; metabolic desert; and VEGF desert as represented in the first track. Stroma, immune scores, and enrichment signatures noted for representative cell types are presented below (e.g., ly Endothelial cells: Lymphatic endothelial cells; mv Endothelial cells: Microvascular endothelial cells).

L) Multi-omic subtyping based on non-negative matrix factorization (NMF). RNA expression, CNV, and global protein abundance data were integrated into this analysis to reveal NMF sample clusters contained in this cohort. The bottom part of the heatmap indicated the membership score of each subtype.

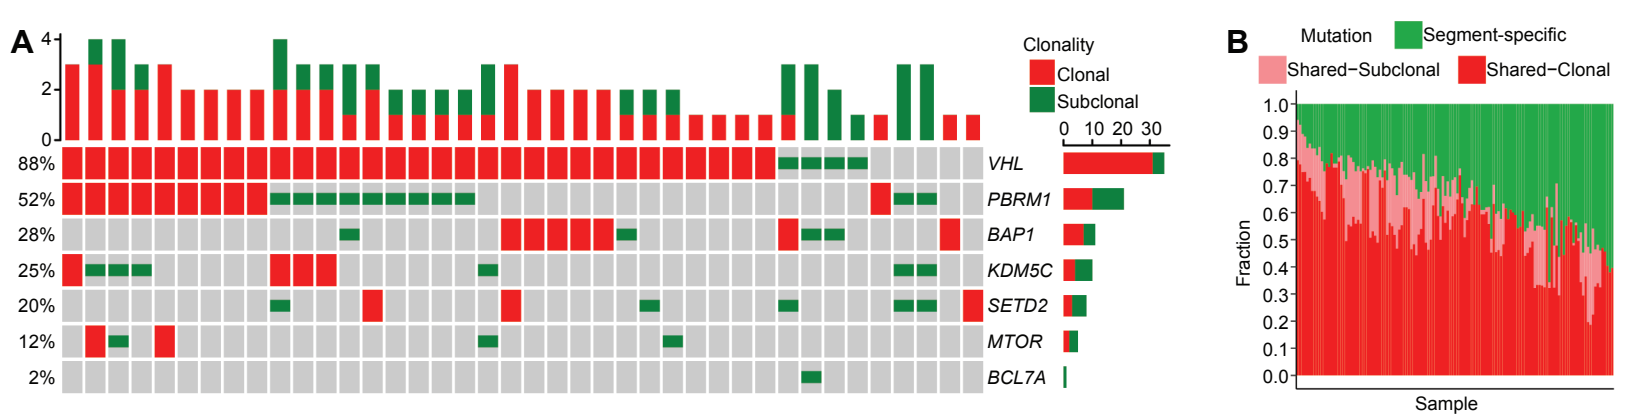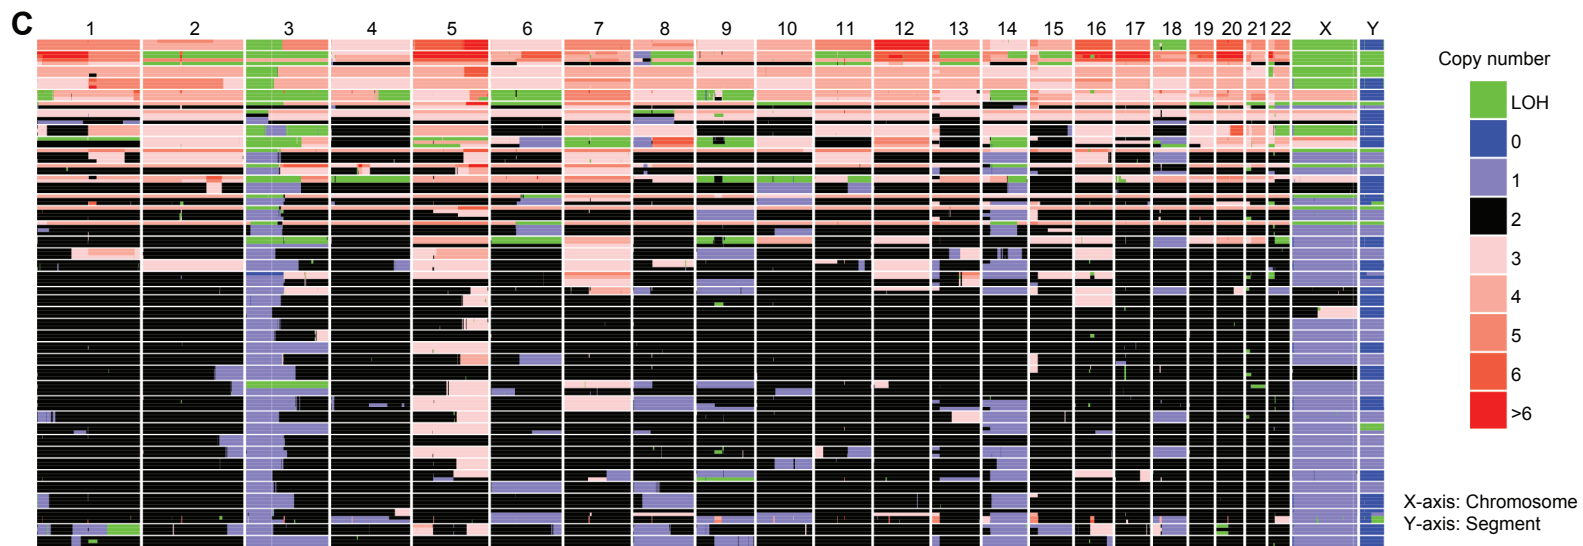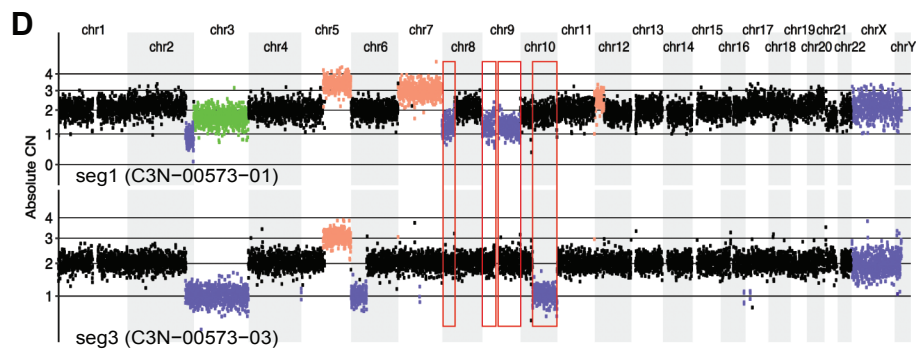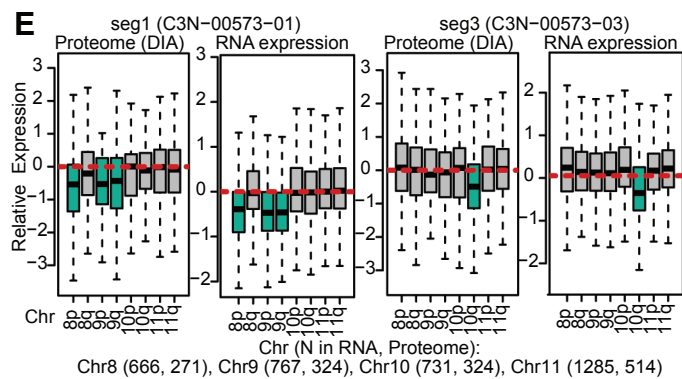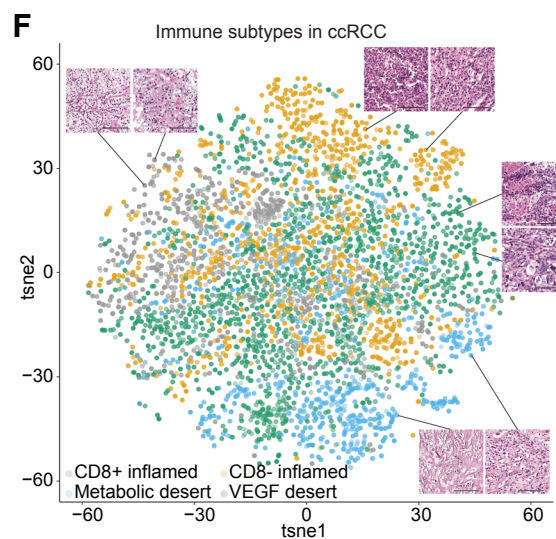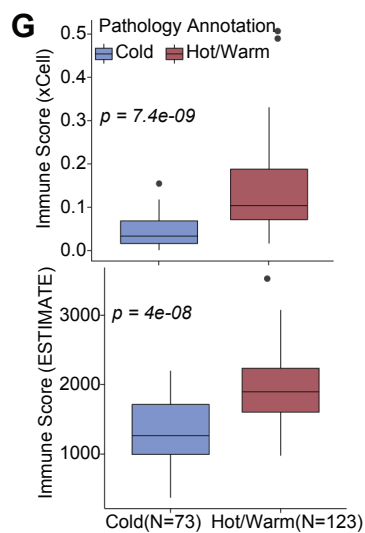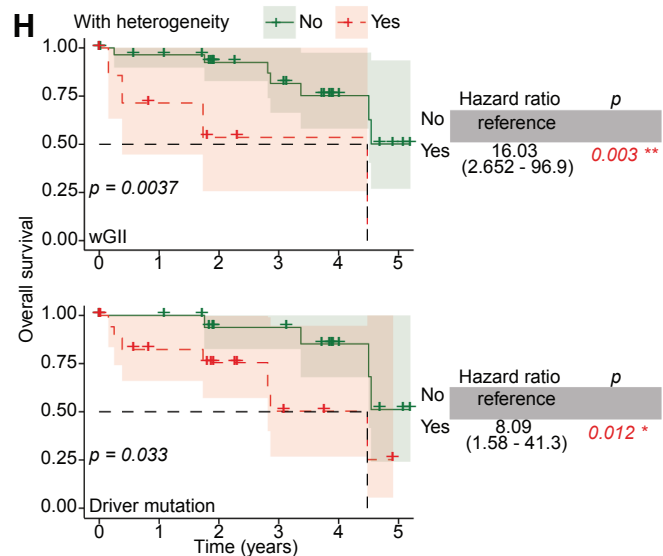

**Figure S2. Integrated proteogenomic analysis of ccRCC genetic and TME heterogeneity, related to Figure 2.**

A) Landscape of driver mutations and their clonality across the ITH cohort segments. Each column represents all segments from a given case. While VHL aberrations were predominantly clonal (red) in nature, others showed greater degrees of sub-clonality (green).

B) Heatmap depicts the frequency of segment-specific (green), shared-subclonal (pink), and shared-clonal (red) somatic mutational events found across tumors and/or even across segments of a given tumor.

C) Heatmap of the absolute copy number determined from whole exome / whole genome sequencing data for 132 tumor segments obtained from 40 ccRCC patients in the ITH cohort (cases clustered by CNV pattern and segments ordered by case numbers). Each row (x-axis) depicts a segment from a given case and columns (y-axis) represent chromosomes. Black: diploid; green: loss of heterozygosity; blue: copy loss; red: copy gains. CNV heterogeneities (e.g., chr5, 7, 9, 14) indicate the varied tumor subpopulations.

D) Absolute copy number (CN) plots reveal the copy number heterogeneity found across segments for a given case (C3N-00573). Black: diploid; green: loss of heterozygosity; blue: copy loss; and red: copy gains. Red boxes highlight the observed copy number losses on chromosomes 8, 9, and 10.

E) Dosage effects of CNV observed at protein and RNA expression levels. Box plots show the relative expression (tumor vs. normal) of genes and proteins found on chromosomes 8, 9, and 10 for the two segments from case C3N-00573. Corresponding loss of expression (green) associated with copy number change can be readily visualized as compared to genes on unaltered chromosomes (Gray) in each segment. Boxes represent the interquartile range (IQR, e.g., median indicated by solid line in box, 0.25 and 0.75 quantiles) and whiskers represent the largest and smallest values within 1.5 x IQR range.

F) t-SNE of the data obtained from Panoptes-based multi-resolution neural network models that were trained to predict immune subtypes based on H&E images. Each dot represents a tile from a sample with dots colored by the immune subtypes, representing specific tiled regions on H&E images. Scale bar = 200 microns.

G) High concordance was observed between the sample immune annotations rendered by pathology team review and by data-driven delineation for the overall immune infiltration level (ESTIMATE immune score and xCell immune score). Wilcoxon signed-rank test p is calculated. Boxes represent the interquartile range (IQR, e.g., median indicated by solid line in box, 0.25 and 0.75 quantiles) and whiskers represent the largest and smallest values within 1.5 x IQR range.

H) Overall survival difference among the cases with vs. without heterogeneity in wGII status or driver mutations (in *VHL*, *PBRM1*, *KDM5C*, *SETD2*, *BAP1*). Kaplan Meier plot indicates the association between overall survival and wGII or driver mutation heterogeneity. Forest plot for Cox Proportional Hazards Model shows the hazard ratio by adjusting by age, sex, and tumor grade. Log-rank test p is calculated. Cox model hazard ratio is shown in the table on the right.

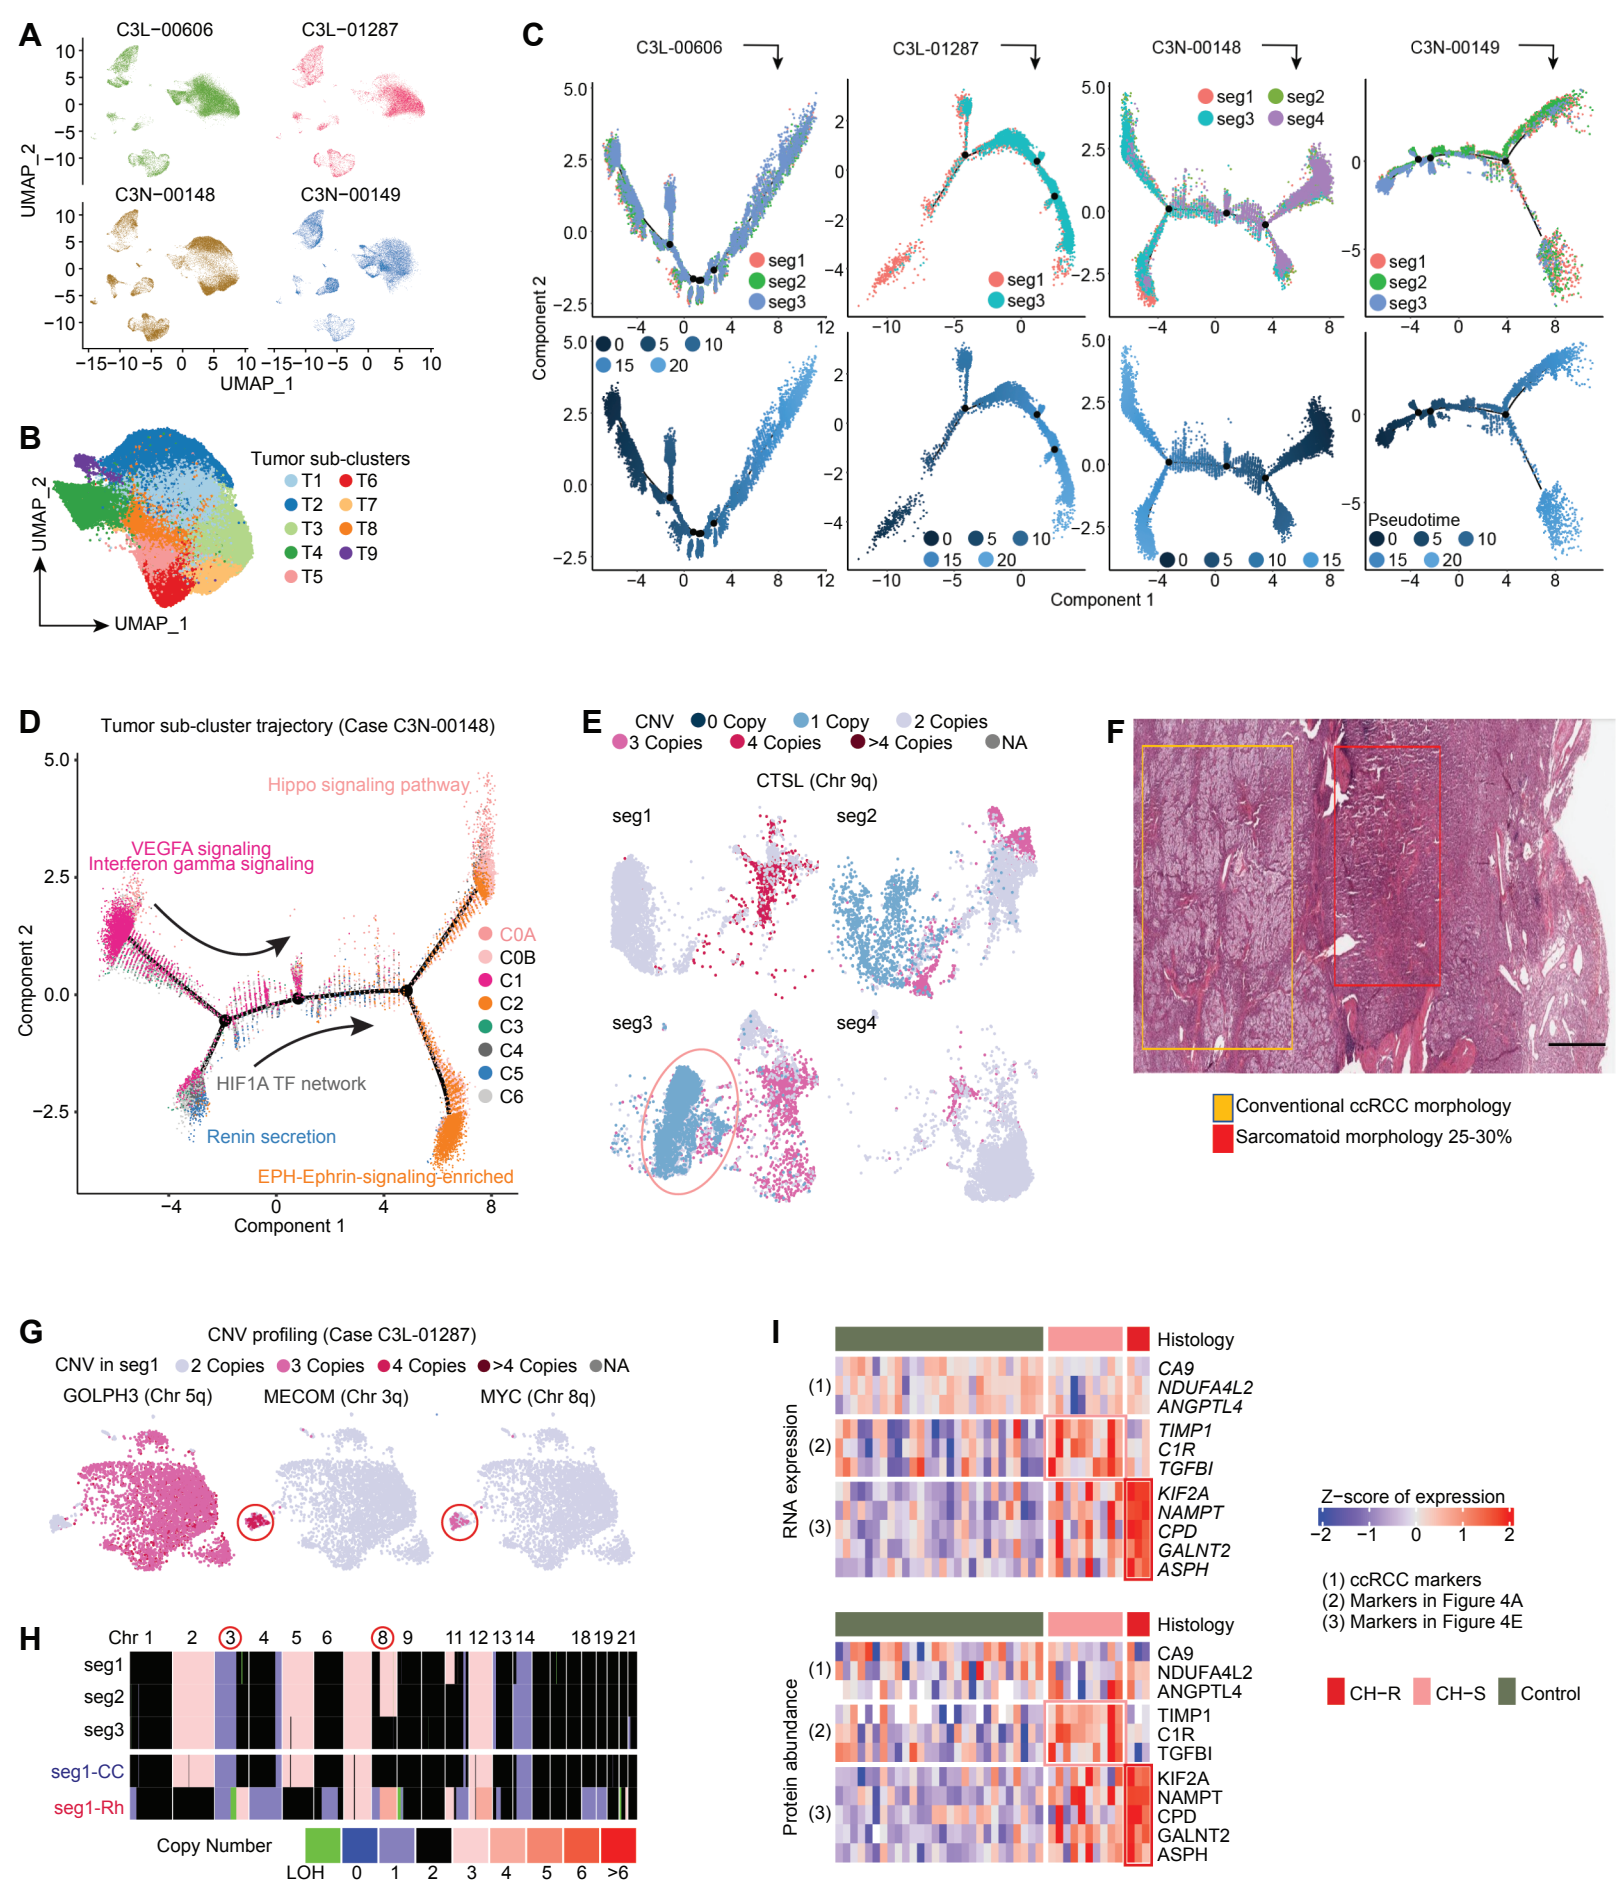

**Figure S3. Single-nuclei RNA-seq analysis identified sarcomatoid and rhabdoid expression signatures, related to Figures 3-4.**

A) The UMAP dimensionality reduction plot displays 10 different cell types (based on biomarker expression and colored accordingly) identified from 104,654 nuclei (with anchoring process) split by cases.

B) The main tumor cluster in Figure S3A includes 9 tumor sub-clusters being enriched in different cases colored by different colors.

C) Trajectory analysis of the four cases is shown and colored by segment ID and predicted pseudotime on the first and second rows, respectively.

D) Tumor sub-cluster trajectory obtained from pseudotime gene expression analysis of case C3N-00148 that shows the relationship among the various tumor sub-clusters.

E) CNV mapping to UMAP shows that segment-3-enriched sub-clusters (C3N-00148) were featured with CNV events including chr9q loss. In these clusters, we also detected 9p (e.g., JAK2) and 13 loss (e.g., RB1).

F) H&E image of the selected region of C3N-00148 segment-3 showing distinct sarcomatoid differentiation and spindle cell proliferation (~25-30%, right side box) juxtaposed to a region with clear cell morphology (left box). Scale bar = 300 microns.

G) Inferred copy number variation (CNV) of select chromosomes mapped to UMAP shows that sub-cluster C0 was characterized by 8q and 3q gains while 5q gain was prevalent in other tumor clusters.

H) Copy number characterization using WES of macro-dissection confirmed the distinct CNV features in the clear cell area (seg1-CC) and rhabdoid area (seg1-Rh).

I) Heatmaps indicate the expression profiles of candidate feature-associated markers (e.g., sarcomatoid, rhabdoid) at the bulk RNA and protein levels.

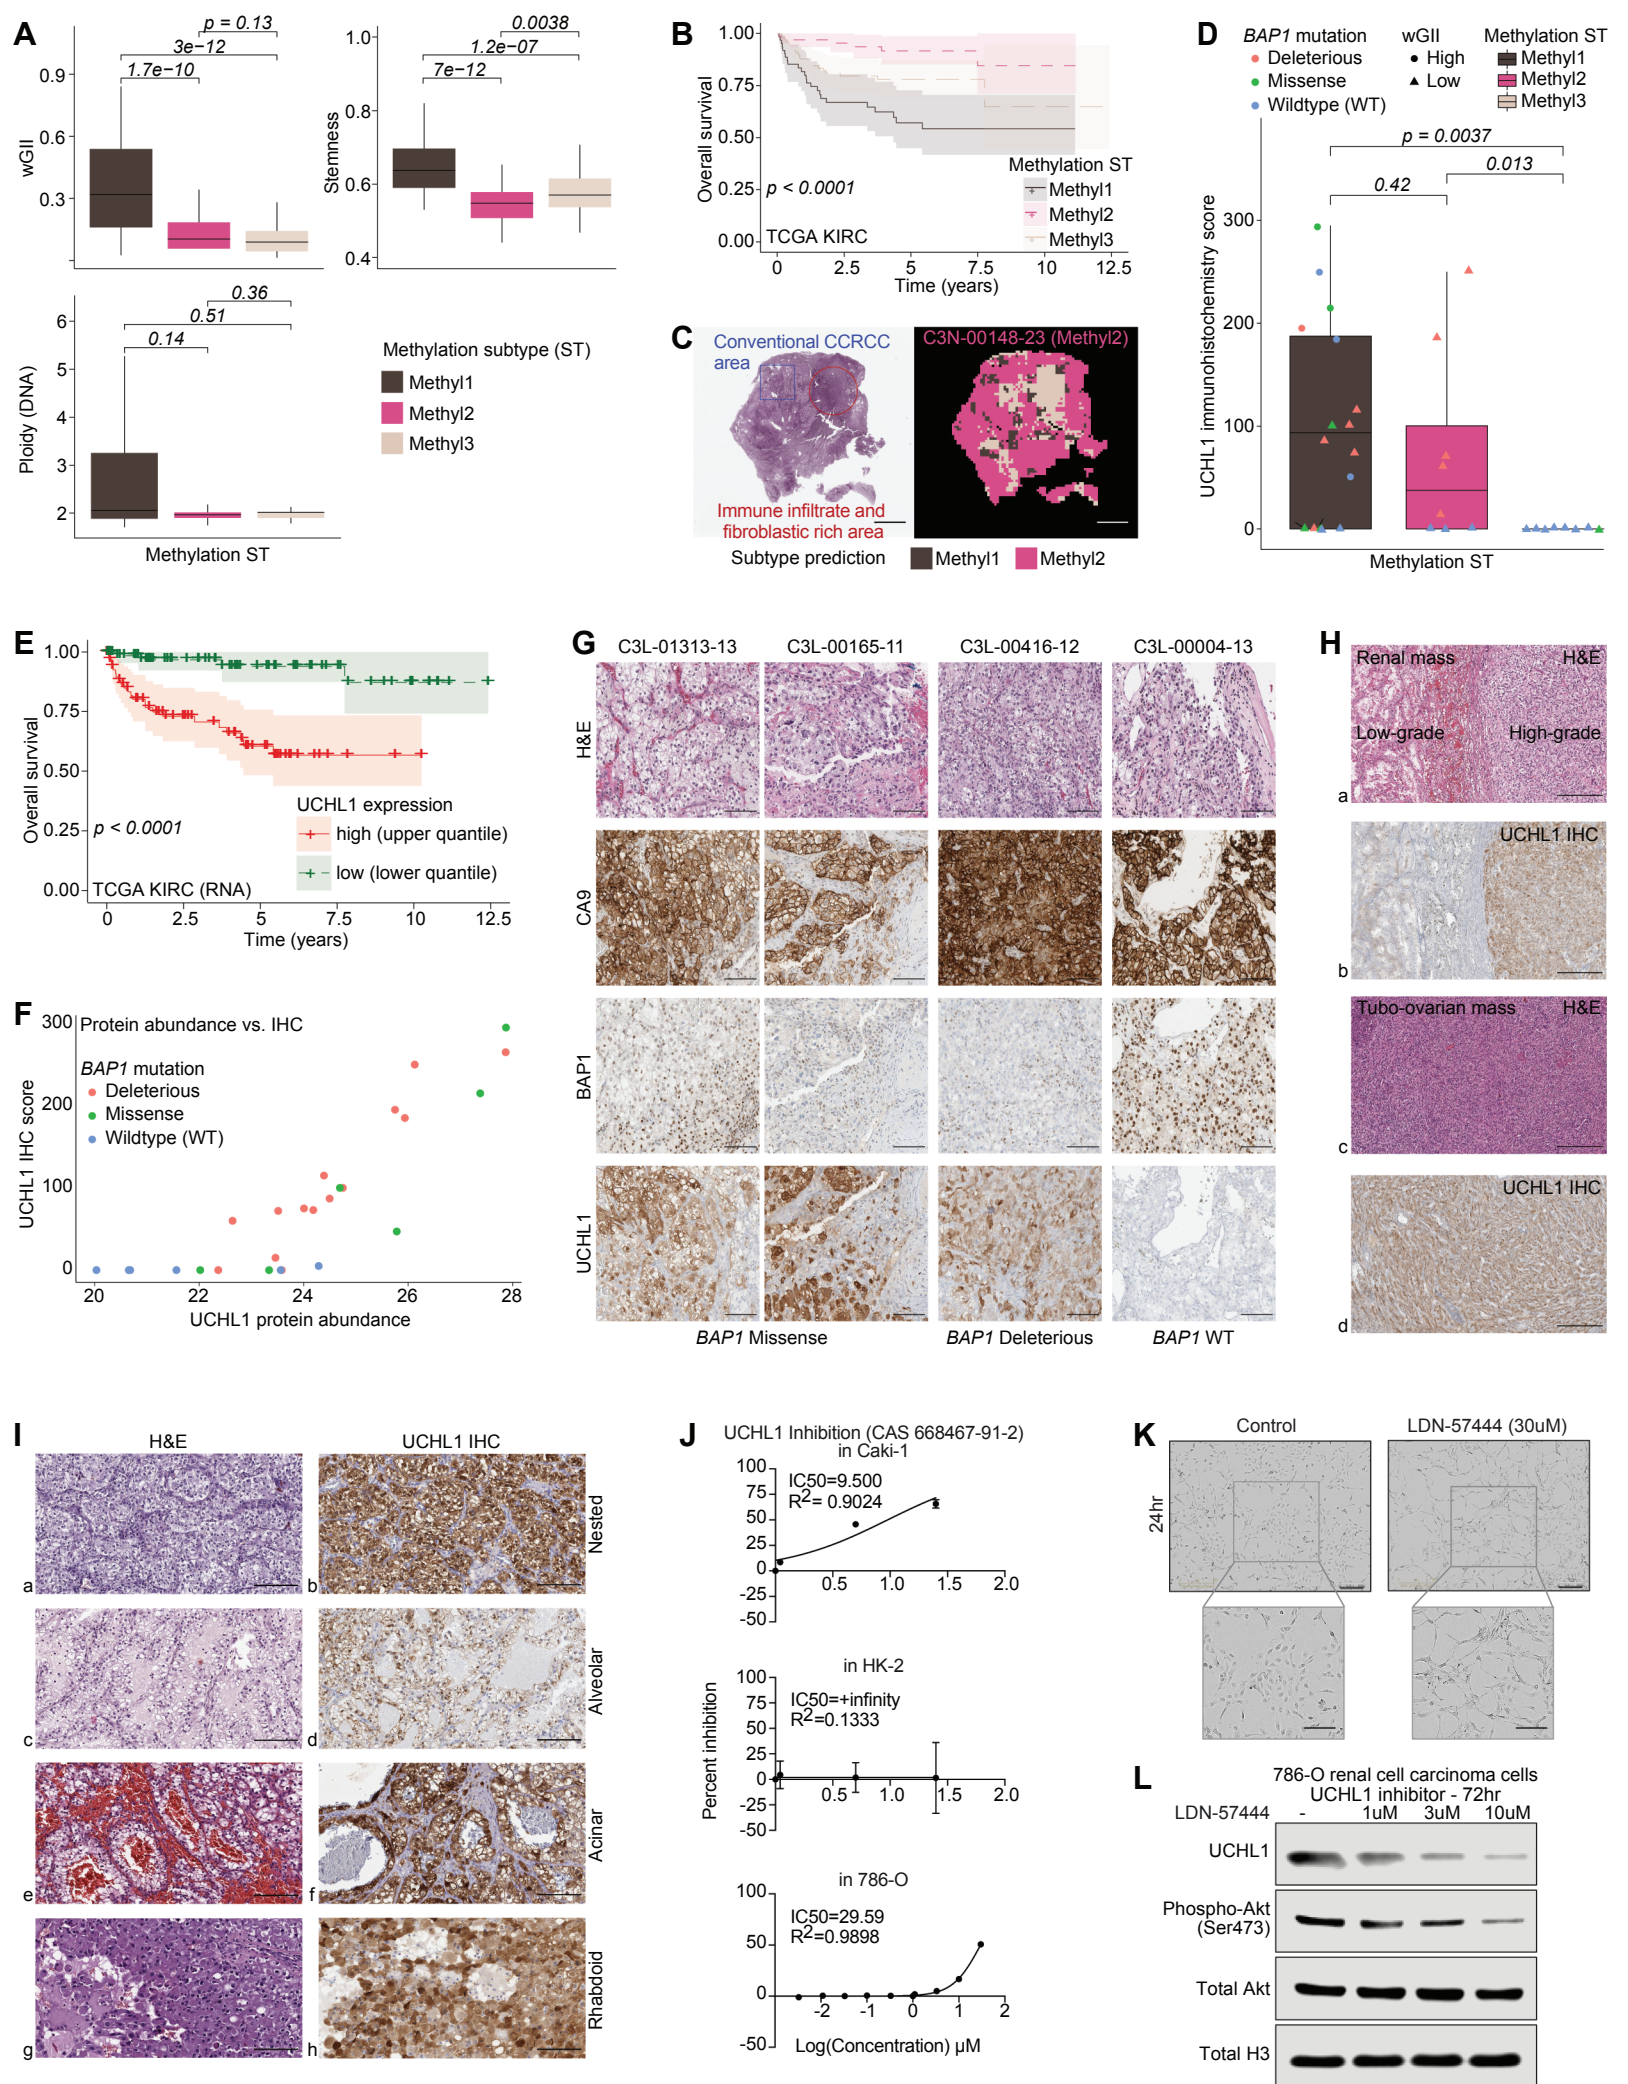

**Figure S4. Methylation subtype associated with *BAP1* mutations and poor survival, related to Figure 5.**

A) Box plots present the distributions of ploidy, wGII score, and stemness score among the methylation subtypes. Significant associations between Methyl1 and wGII, ploidy can be observed. Wilcoxon signed-rank test p is calculated. Boxes represent the interquartile range (IQR, e.g., median indicated by solid line in box, 0.25 and 0.75 quantiles) and whiskers represent the largest and smallest values within 1.5 x IQR range.

B) Kaplan Meier plot indicates the association between overall survival and the three methylation subtypes in TCGA clear cell RCC KIRC cohort. The Methyl1 subtype is significantly associated with poor survival. Log-rank test  $p < 0.0001$ .

C) Panoptes-based multi-resolution neural network models were trained to predict methylation subtypes based on H&E image. C3N-00148 was classified as Methyl2 which has classic ccRCC histology with marked trabecular change and immune-rich area. Scale bar = 300 microns.

D) The distribution of UCHL1 immunohistochemistry score among methylation subtypes represented by boxplot, and annotated by wGII category and *BAP1* mutation status. Wilcoxon signed-rank test p is calculated. Boxes represent the interquartile range (IQR, e.g., median indicated by solid line in box, 0.25 and 0.75 quantiles) and whiskers represent the largest and smallest values within 1.5 x IQR range.

E) Kaplan Meier plot indicates the association between overall survival and UCHL1 expression in TCGA KIRC cohort. High UCHL1 expression (upper quartile of the cohort) is significantly associated with poor survival. Log-rank test  $p < 0.0001$ .

F) High correlation between quantified UCHL1 protein abundance versus UCHL1 IHC score is represented by scatter plot. *BAP1* mutation type (deleterious: red, missense: green) and status (wild-type- blue, mutant- red, or green) of the evaluated tumors are indicated.

G) Representative H&E and immunohistochemistry (IHC) images from CAIX, *BAP1*, UCHL1 IHC validations performed on *BAP1* wild-type and mutated tumors. UCHL1 is overexpressed in most *BAP1* mutated tumors while *BAP1* is variably downregulated in *BAP1* mutated tumors. CAIX positivity in all cases as to validate ccRCC cases. Scale bar = 3mm.

H) Characterization of UCHL1 in a patient with primary renal mass (positive UCHL1 expression, stronger in higher grade than lower grade tumor area) (a, b). High and uniform UCHL1 expression in metastatic sarcomatoid differentiated ccRCC tubo-ovarian mass in the same patient (c, d). Scale bar = 200 microns.

I) Strong homogeneous expression of UCHL1 in primary tumors of four different clinically aggressive patients (who developed metastasis) despite varying morphological patterns- conventional nested (a, b), alveolar (c, d), acinar (e, f), and rhabdoid (g, h). Scale bar = 200 microns.

J) Plots indicate the half maximal inhibitory concentration (IC50) of UCHL1 inhibition (CAS 668467-91-2) in Caki-1, HK-2, and 786-O, respectively.  $R^2$  is the square of the correlation.

K) Morphology of Control and CAS 668467-91-2 (30uM, 24hr) treated 786-O renal cancer cells. Scale bars = 300 microns (top), and 200 microns (bottom).

L) Impact of UCHL-1 inhibition on Akt signaling in 786-O renal cancer cells evaluated by Western blot analysis.



**A**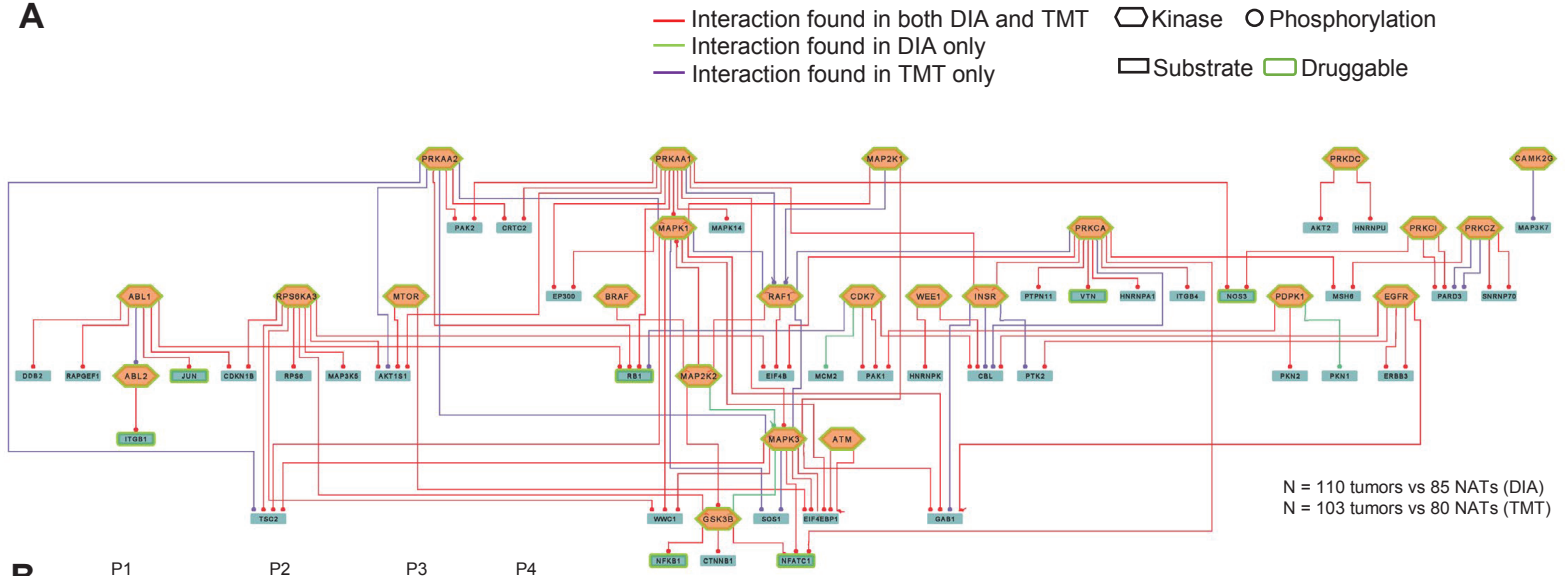**B**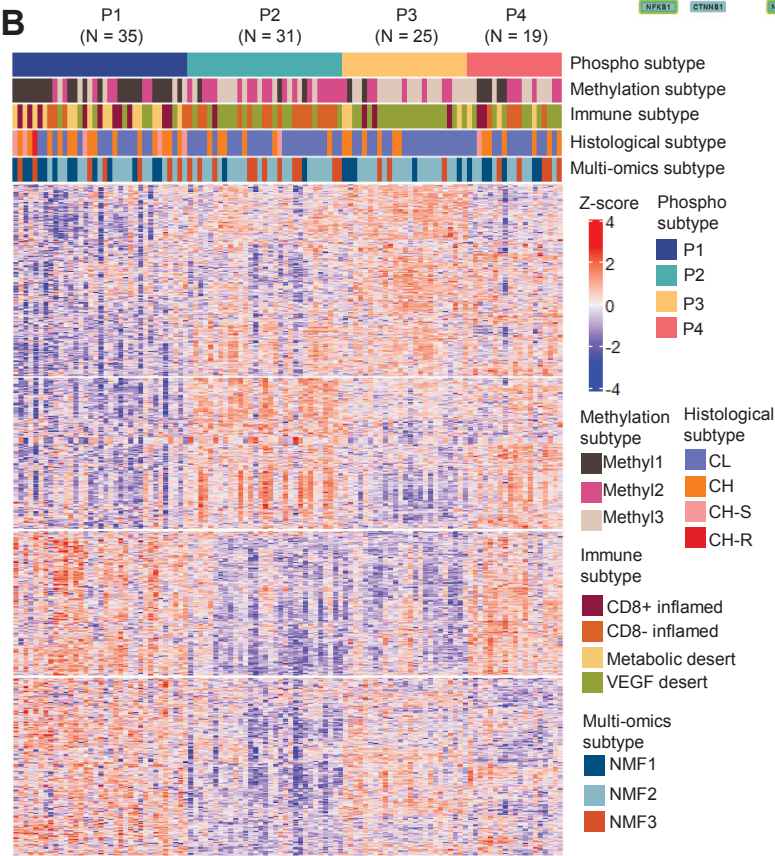**C**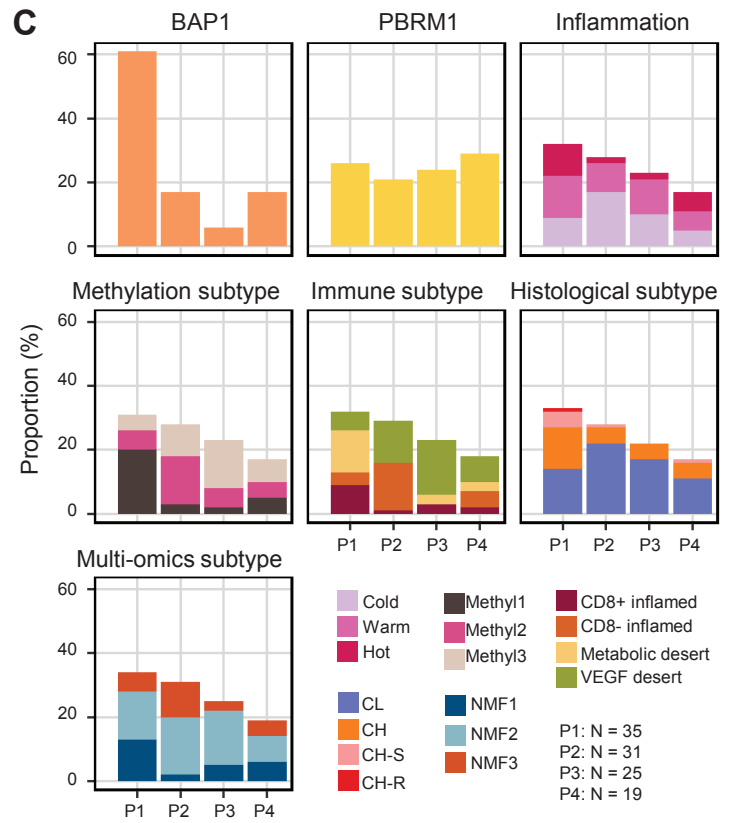**D**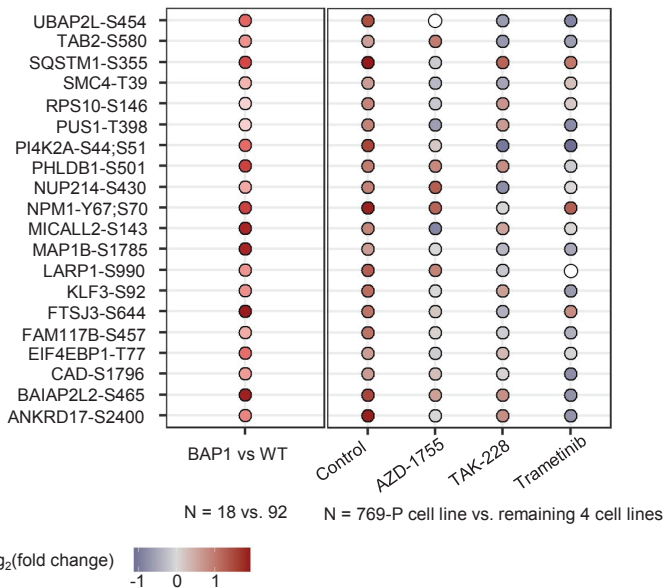**E**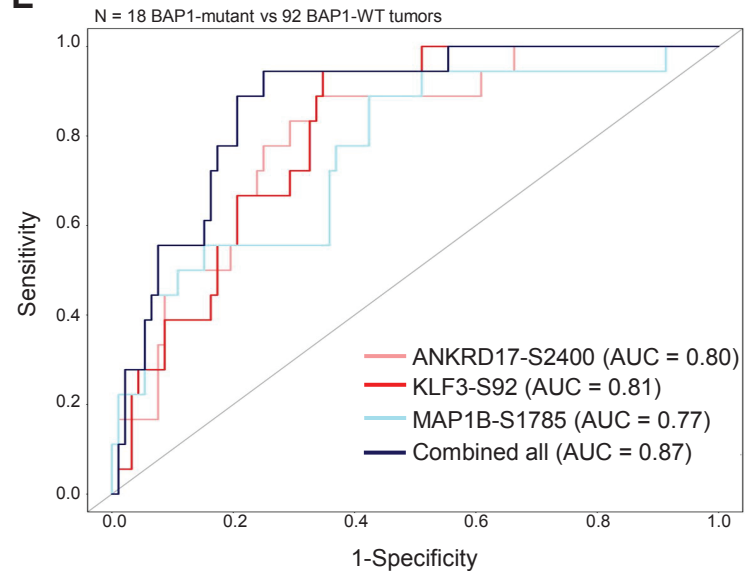

**Figure S5. Phosphoproteomic analysis, related to Figure 6.**

A) An expanded view of the phospho-signaling network.

B) Heatmap showing K-means clustering results of the phosphoproteomic features among the phosphoproteomic groups.

C) Stacked bar plots highlight the association between select important ccRCC disease variables and the different phosphoproteomic groups.

D) Phosphorylation events upregulated in *BAP1* mutant versus *BAP1* WT tumors comparison as revealed by DIA-based profiling in the tissue cohort and the status of those sites upon various treatments in RCC cell lines.

E) ROC analysis of significantly changed phosphorylation events in *BAP1* mutant and WT tumors.

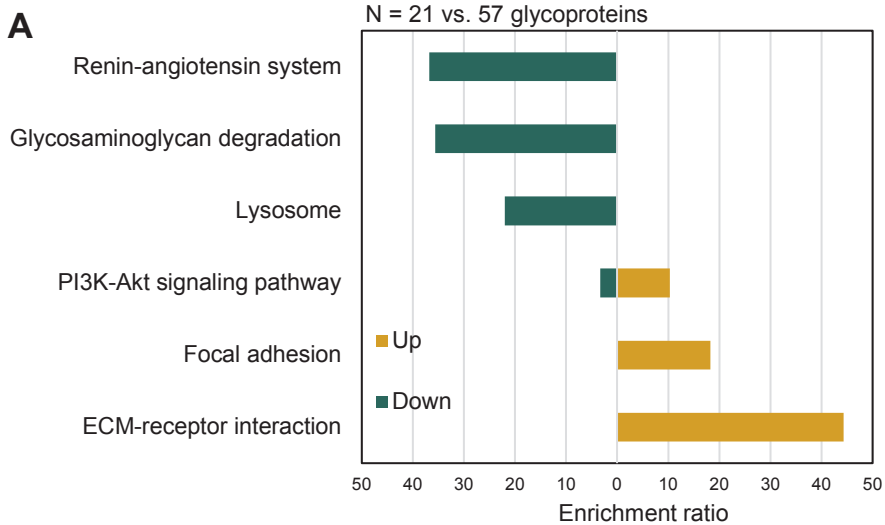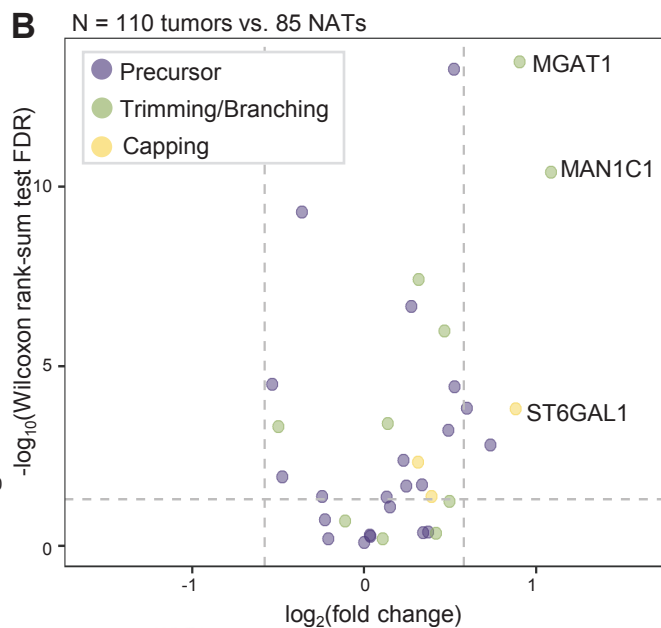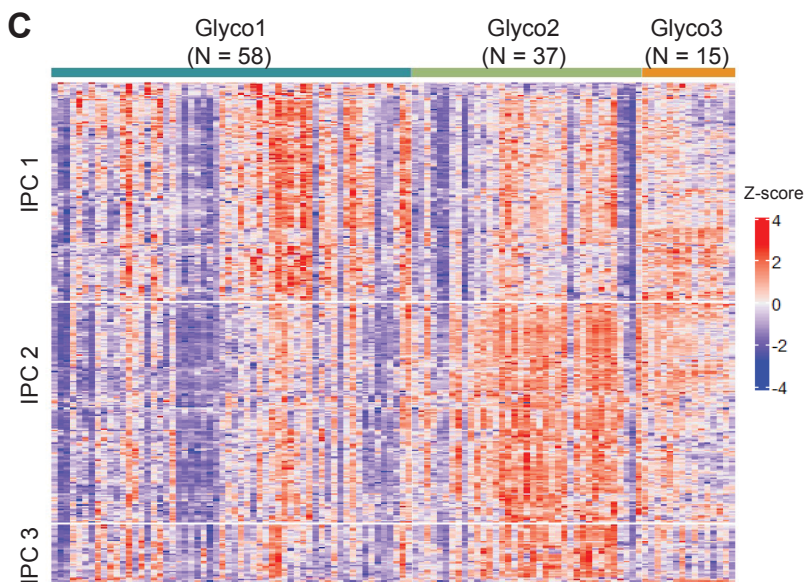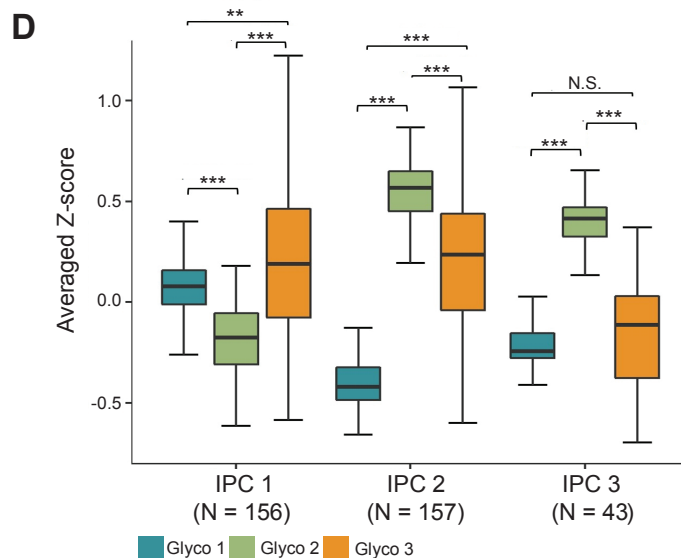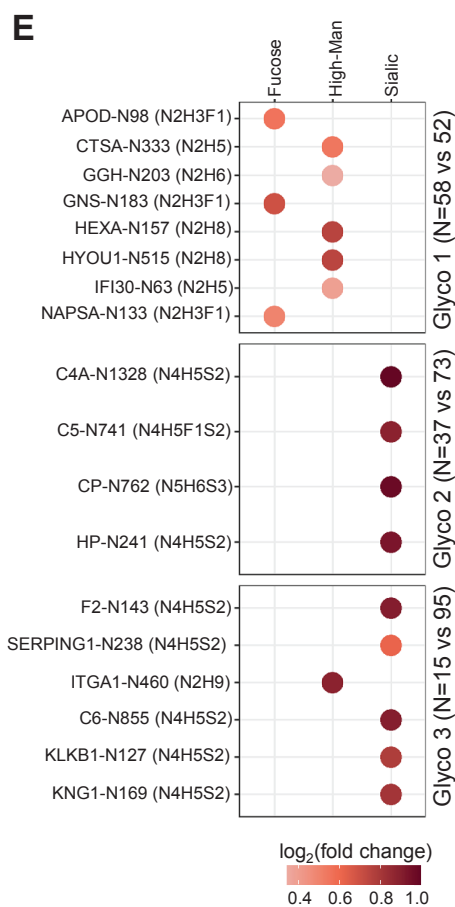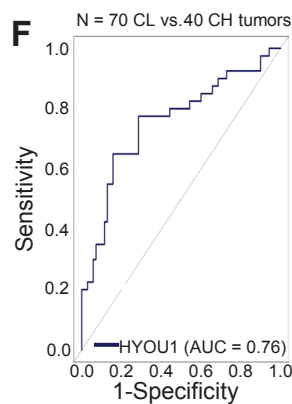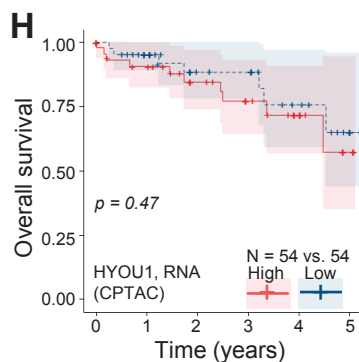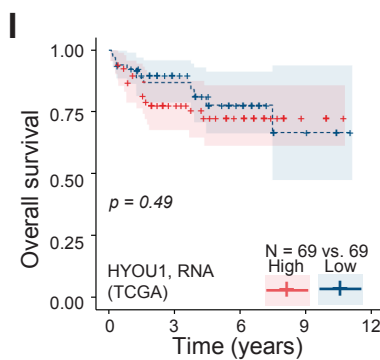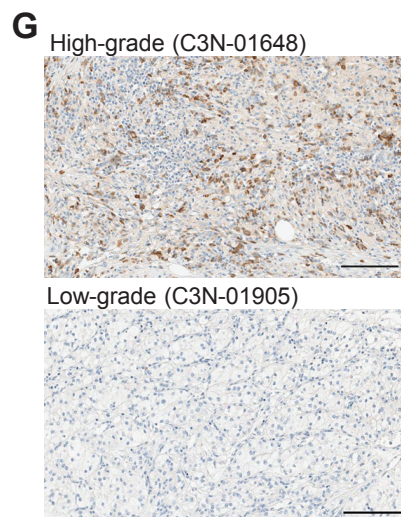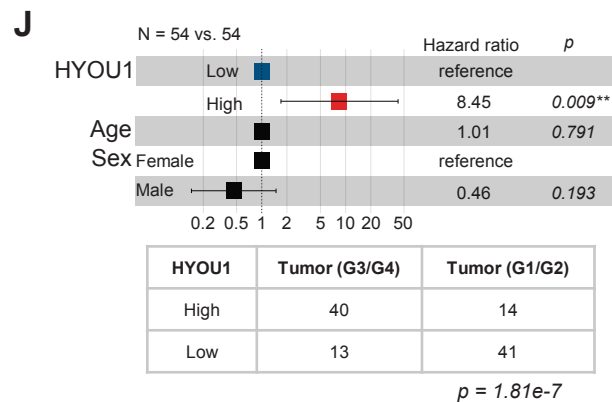

**Figure S6. Alteration of protein glycosylation specific to ccRCC and high-grade ccRCC, related to Figure 7.**

- A) Significant enriched KEGG pathways using the glycoproteins that exhibit differential intact glycopeptide expression in tumors compared to NATs. All the enriched pathways had FDR < 0.05.
- B) Volcano plot depicts the differentially expressed glycosylation enzymes (n = 35) at the global protein level. Five glycosylation enzymes with >1.5-fold increase (FDR <0.05) in tumors relative to NATs.
- C) K-means clustering of the glycoproteomic features in three glycoproteomic subtypes for tumors. Three intact glycopeptide clusters (IPC) were discriminated (IPC1-3).
- D) Distribution of each glycoproteomic subtype in association with IPCs shown as boxplots. The outline of the box denotes the interquartile range, the solid line in the box indicates the median, and the whiskers outside of the box extend to the minimum and maximum “averaged Z-score”. Wilcoxon signed-rank test FDR is calculated. N.S.  $p \geq 0.05$ , \*  $p < 0.05$ , \*\*  $p < 0.01$ , \*\*\*  $p < 0.001$ .
- E) Bubble plots represent upregulated intact glycopeptides in association with the Glyco subtypes.
- F) Performance of HYOU1 for differentiating low-grade and high-grade tumors.
- G) Immunohistochemistry staining of HYOU1 protein expression in high-grade (C3N-01648) versus low-grade (C3N-01905) tumor. Scale bar = 200 microns.
- H) Kaplan Meier plot compares HYOU1 between High (upper quartile) and Low (lower quartile) groups at the RNA level in the CPTAC cohort. Log-rank test p is 0.47.
- I) Kaplan Meier plot compares HYOU1 between High (upper quartile) and Low (lower quartile) groups at the RNA level in the TCGA cohort. Log-rank test p is 0.49.
- J) Forest plot for Cox Proportional Hazards Model adjusting by age and sex (comparing HYOU1 high and low at the protein level in the CPTAC cohort). The hazard ratio of high group is 8.45 from Cox model ( $p = 0.009$ ). Whiskers represent + / - 95% confidence intervals of the hazard ratios. Fisher's exact test result indicates the association between tumor grade and HYOU1 protein abundance ( $p = 1.81e-7$ ).

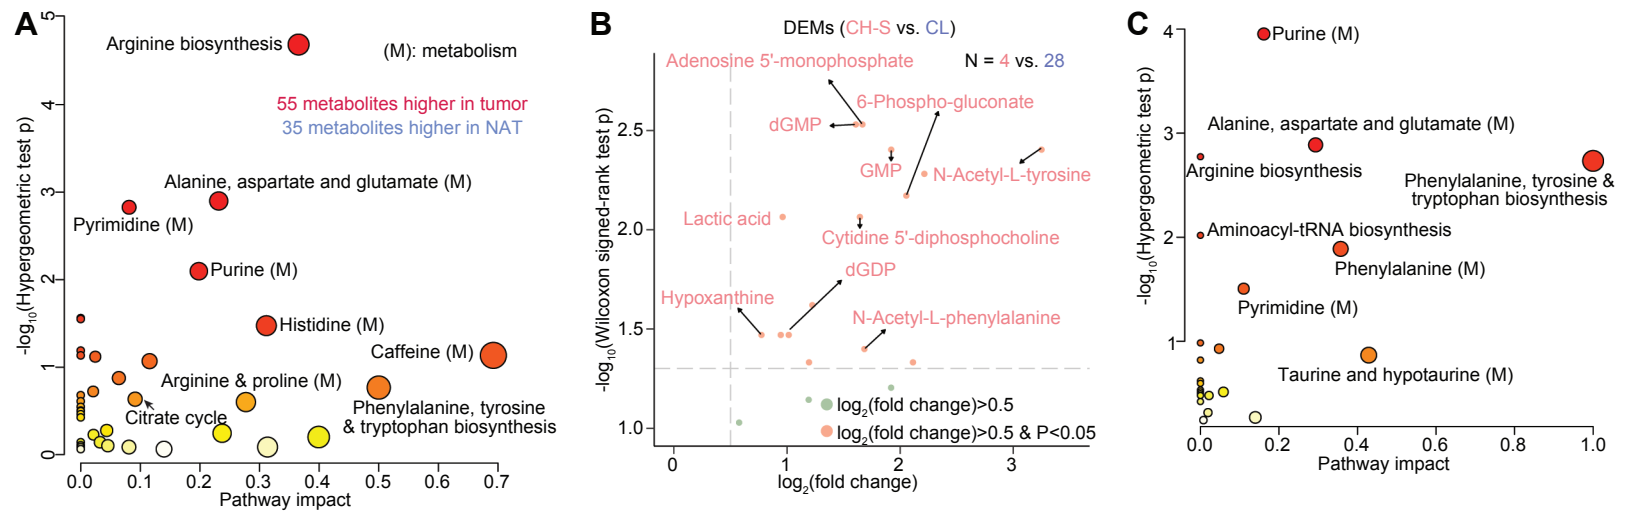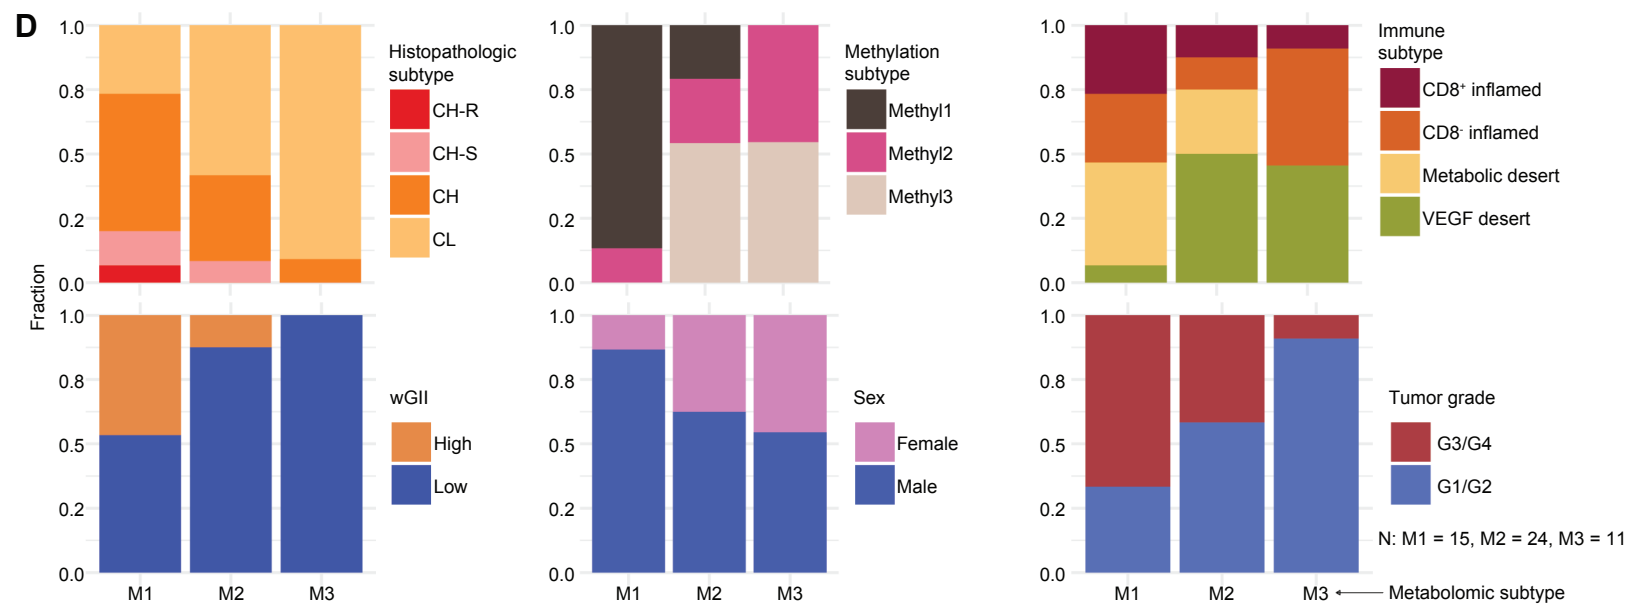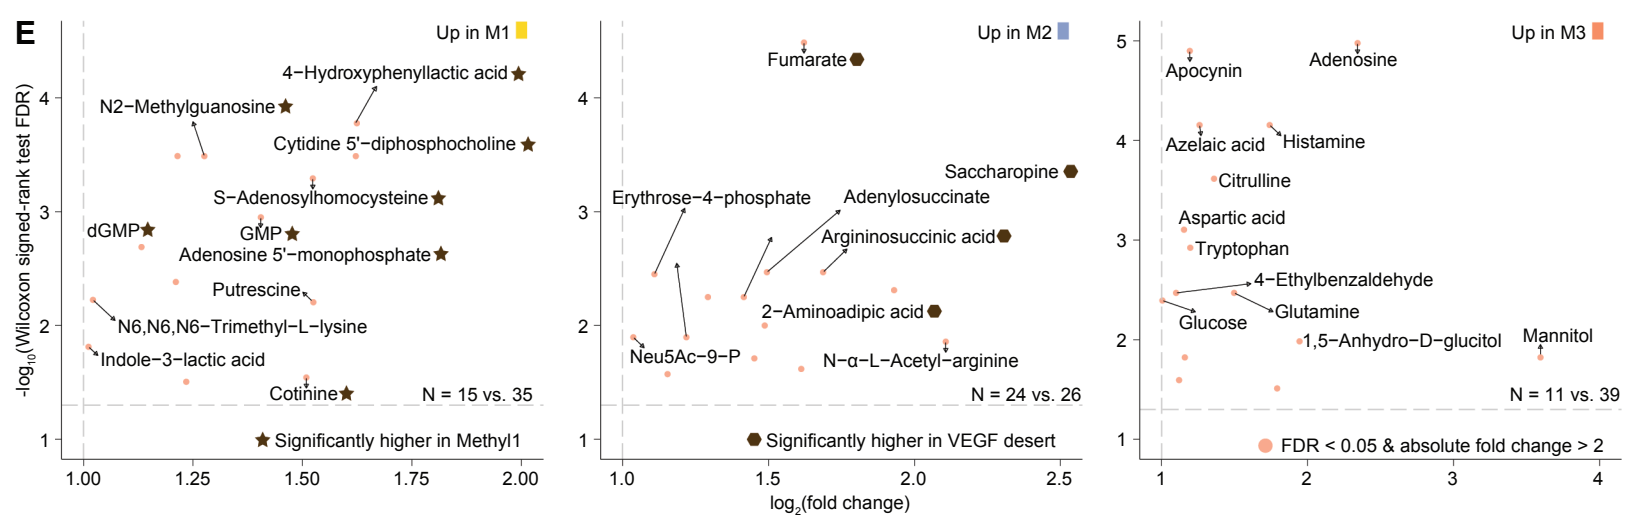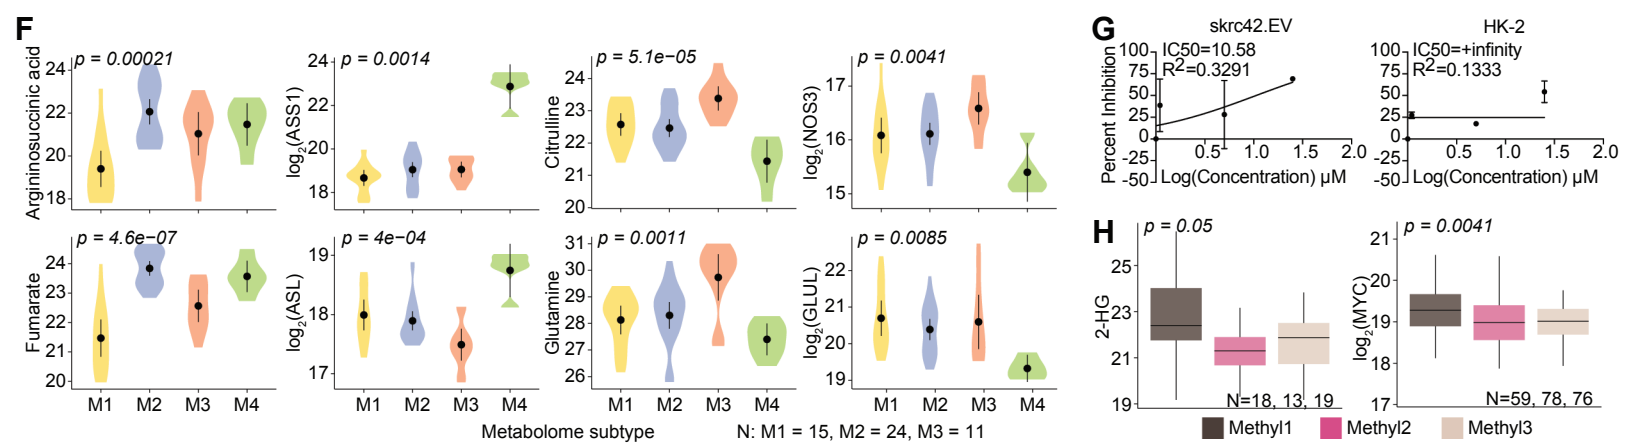

**Figure S7. Dysregulated metabolism in high-grade ccRCC and low-grade ccRCC, related to Figure 8.**

- A) Enriched metabolic pathways in the comparison of tumors and NATs.
- B) Volcano plot shows the upregulated DEMs in CH-S compared with CL.
- C) Enriched metabolic pathways corresponding to CH-S.
- D) The distributions of histopathologic, methylation, and immune subtypes, wGII status, sex, and tumor grade among the metabolomic subtypes.
- E) Upregulated metabolites associated with each of the methylation subtypes.
- F) Expression profiles of key metabolites and enzymes in arginine and proline metabolism. Kruskal-Wallis test p is calculated. Within the violin plots, the dots represent the mean and solid lines indicate the error limit defined by the 95% confidence interval. The violin plot outlines demonstrate the kernel probability.
- G) Plots indicate the half maximal inhibitory concentration (IC<sub>50</sub>) of GLUL inhibition in skrc42.EV and HK-2, respectively. R<sup>2</sup> is the square of the correlation.
- H) 2-HG and MYC expressions were significantly higher in Methyl1 (methylation subtype associated with the worse prognosis). Kruskal-Wallis test p is calculated. Boxes represent the interquartile range (IQR, e.g., median, 0.25 and 0.75 quantiles) and whiskers represent the largest and smallest values within 1.5 x IQR range.
